# Supplementary material for: Function of IRAG2 Is Modulated by NO/cGMP in Murine Platelets
Source: MDPI journal article supplement (doi:10.3390/ijms23126695), 2022-06-15
Supplement: s1 [file s1]

**Supplementary Material**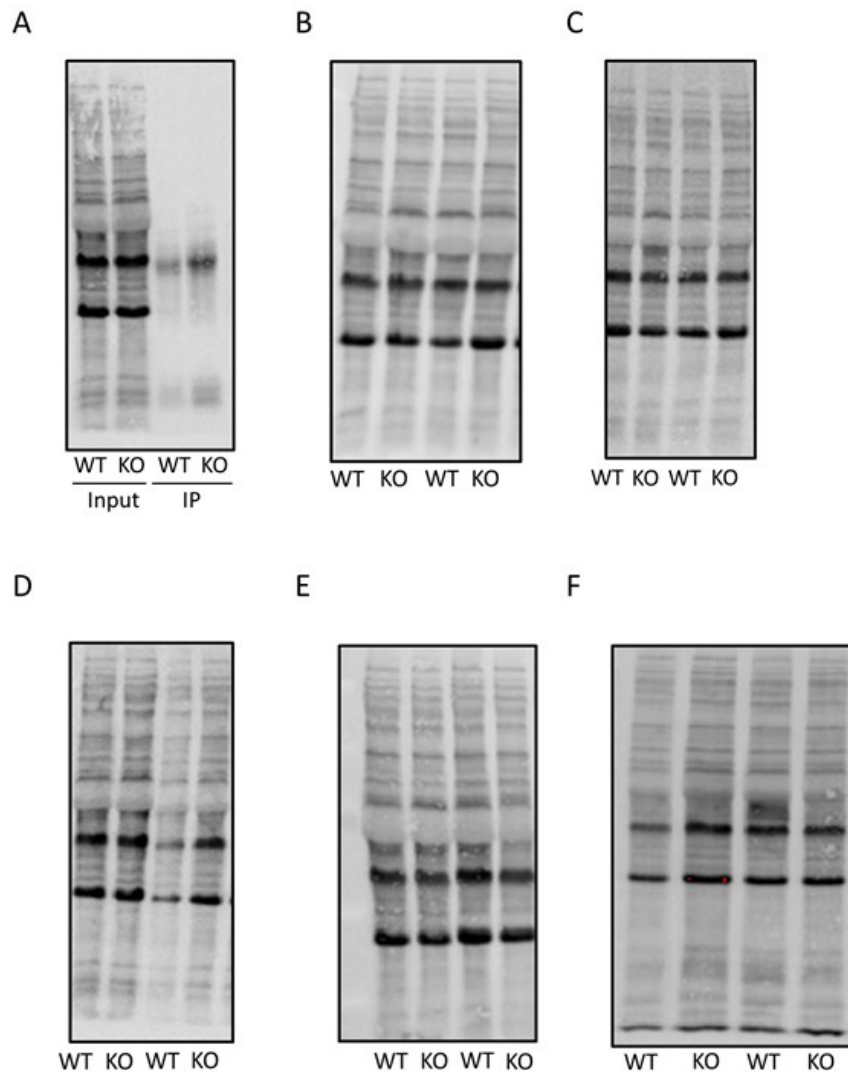

**Figure S1.** Total protein images of platelets from co-immunoprecipitation (A) and analysis of IP<sub>3</sub>R1 (B), IP<sub>3</sub>R2 (C), IP<sub>3</sub>R3 (D), IRAG1 (E) and PKGI $\beta$  (F) expression.

Total protein images from Western Blots for co-immunoprecipitation (Figure 2A) and analysis of expression of IP<sub>3</sub>R1 (Figure 2B), IP<sub>3</sub>R2 (Figure 2C), IP<sub>3</sub>R3 (Figure 2D), IRAG1 (Figure 2E) and PKGI $\beta$  (Figure 2F) in platelets from IRAG2-WT (WT) and IRAG2-KO (KO) mice. Input per lane: 70  $\mu$ g of protein for analysis of IRAG1, IP<sub>3</sub>R1, IP<sub>3</sub>R2 and IP<sub>3</sub>R3 expression and 35  $\mu$ g of protein for PKGI $\beta$  expression. For co-immunoprecipitation 1000  $\mu$ g of murine platelet lysate was used.

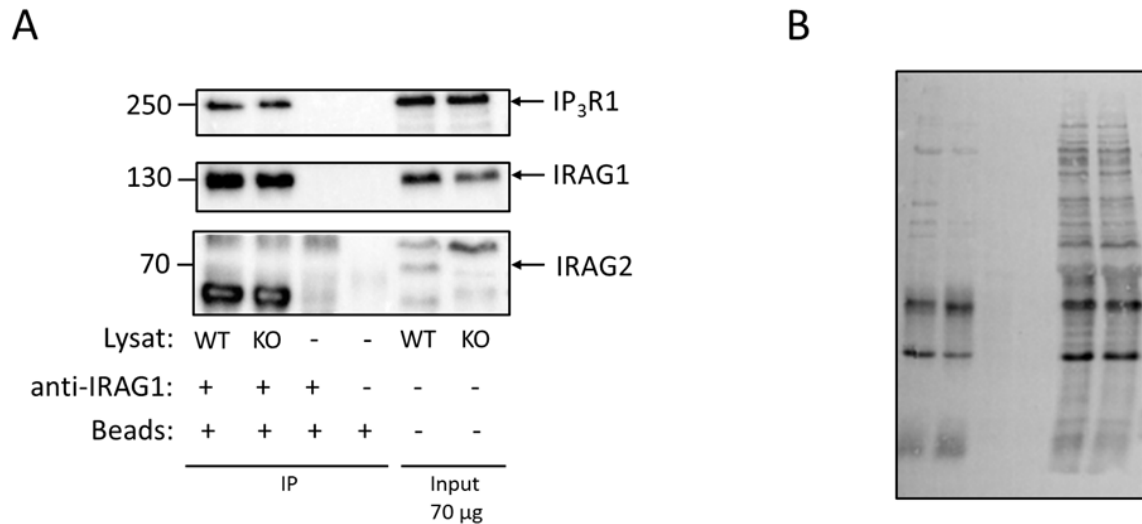

**Figure S2.** Immunoprecipitation of IRAG1 with IRAG1 specific antibody in platelets from IRAG2-WT (WT) and IRAG2-KO (KO) mice and Western Blot analysis of co-immunoprecipitated interaction partners. **(A)** Interaction of IRAG1 with IP<sub>3</sub>R1 and PKG1 $\beta$  in murine platelets was detected in IRAG2-WT (WT) and IRAG2-KO (KO) platelets. No direct interaction of IRAG1 and IRAG2 was detected neither in platelets from IRAG2-WT (WT) nor in IRAG2-KO (KO) platelets. **(B)** Total protein image from Western Blot for co-immunoprecipitation **(A)** is shown. As input probes for IRAG2-WT (WT) and IRAG2-KO (KO) platelets 70 µg of protein and for immunoprecipitation 1000 µg of platelet lysate was used.

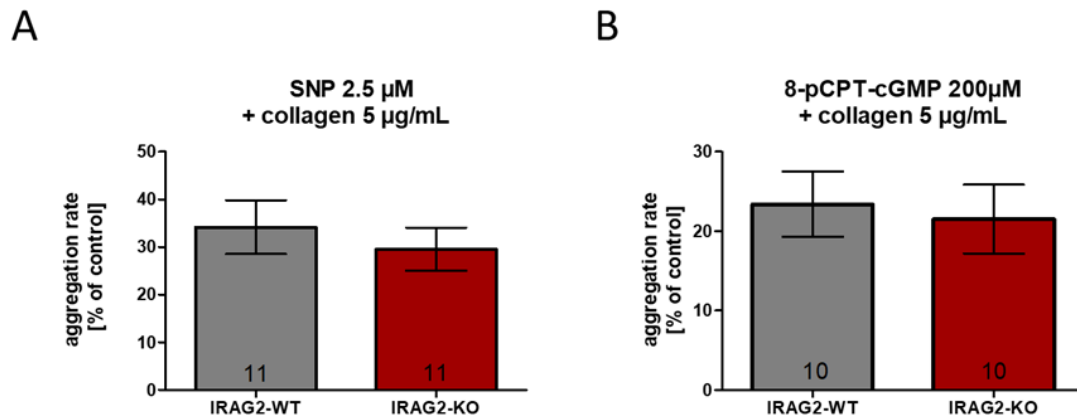

**Figure S3:** NO/cGMP-dependent inhibition of platelet aggregation in platelets from IRAG2-WT and IRAG2-KO mice using SNP 2.5 µM **(A)** or 8-pCPT-cGMP 200 µM **(B)** as an inhibitor and collagen 5 µg/mL to evoke platelet aggregation. Aggregation rate was calculated as maximal slope of the aggregation curve and aggregation rate under treatment with inhibitor is calculated as % of control (control: aggregation rate without inhibitor). Only a weak tendency for a reduced aggregation rate [% of control] was seen in IRAG2-KO platelets compared to IRAG2-WT platelets, which is not significant. For each aggregation  $1.0 \times 10^8$  platelets/ml were used. The number of experiments is shown in the graphs and mean  $\pm$  SEM is shown by bars.
